# Supplementary material
Source: HighWire-hosted journal article supplement (https://bmjopen.bmj.com/content/10/3/e030164)

### **Appendix 3: Supplementary tables**

#### **TABLE OF CONTENTS**

|                                                                                                            |           |
|------------------------------------------------------------------------------------------------------------|-----------|
| <i>Table 1. Prior and concurrent treatment</i> .....                                                       | 3         |
| <i>Table 2. Baseline values of clinical outcomes</i> .....                                                 | 4         |
| <i>Table 3. Baseline demographics of woman by 6 month questionnaire completion</i> .....                   | 5         |
| <b>1. FEASIBILITY OUTCOMES</b> .....                                                                       | <b>7</b>  |
| 1.1. FOLLOW-UP .....                                                                                       | 7         |
| <i>Table 4. Losses to follow up</i> .....                                                                  | 7         |
| Figure 1. Proportion of participants answering follow up questionnaire .....                               | 8         |
| <i>Table 5. Follow-up questionnaire returned or answered by phone within target follow up period</i> ..... | 9         |
| 1.2. STANDARD DEVIATION OF CPAQ.....                                                                       | 10        |
| <i>Table 6. Estimated standard deviation of CPAQ</i> .....                                                 | 10        |
| 1.4. BLINDING .....                                                                                        | 11        |
| <i>Table 7. Unintentional unbinding of randomised treatment</i> .....                                      | 11        |
| <b>2. APP SATISFACTION QUESTIONNAIRES</b> .....                                                            | <b>12</b> |
| <i>Table 8. System usability scale</i> .....                                                               | 12        |
| <i>Table 9. App usability Questionnaire</i> .....                                                          | 13        |
| <b>3. CLINICAL OUTCOMES</b> .....                                                                          | <b>14</b> |
| 3.1. RANGES OF CLINICAL OUTCOMES .....                                                                     | 14        |
| 3.2. COMPLETENESS OF CLINICAL DATA .....                                                                   | 15        |
| <i>Table 10. Partially missing clinical outcomes</i> .....                                                 | 15        |
| <i>Table 11. Partially missing clinical outcomes by method of questionnaire delivery</i> .....             | 17        |
| 3.3. RESULTS OF ANALYSIS OF CLINICAL OUTCOMES .....                                                        | 20        |
| <i>Table 12. Descriptive statistics for clinical outcomes</i> .....                                        | 20        |
| <i>Table 13. Estimated treatment effects for clinical outcomes</i> .....                                   | 23        |

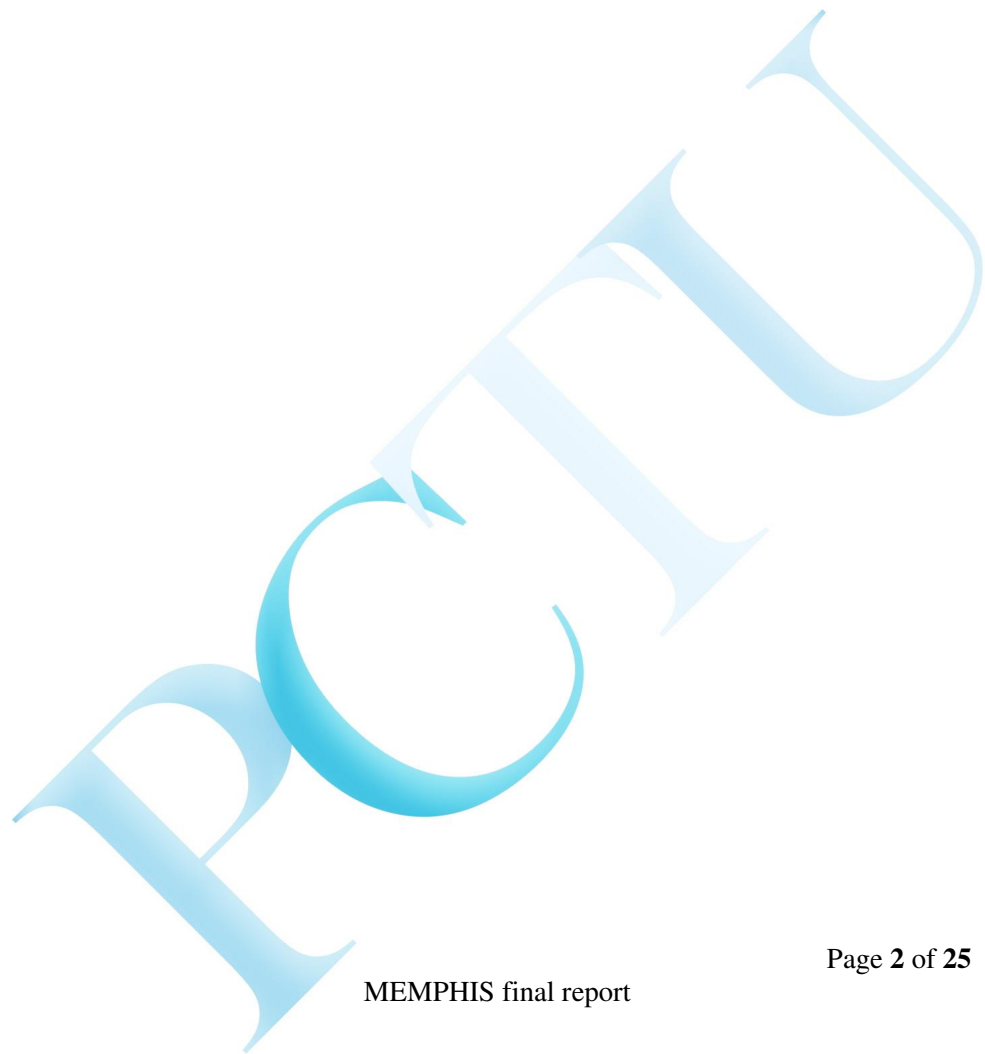

**Table 1. Prior and concurrent treatment**

Figures are number (percentage).

|                                                        | Summary measure        |                          |                      | Missing data              |                             |                         |
|--------------------------------------------------------|------------------------|--------------------------|----------------------|---------------------------|-----------------------------|-------------------------|
|                                                        | Intervention<br>(N=31) | Active control<br>(N=30) | Usual care<br>(N=29) | Intervention<br>- no. (%) | Active control<br>- no. (%) | Usual care<br>- no. (%) |
| <b>Treatment used in the last six months</b>           |                        |                          |                      |                           |                             |                         |
| Acupuncture                                            | 2 (10.5)               | 5 (25.0)                 | 1 (6.3)              | 12 (38.7)                 | 10 (33.3)                   | 13 (44.8)               |
| Massage                                                | 11 (50.0)              | 8 (40.0)                 | 7 (41.2)             | 9 (29.0)                  | 10 (33.3)                   | 12 (41.4)               |
| Gabapentin                                             | 5 (26.3)               | 1 (5.9)                  | 1 (6.3)              | 12 (38.7)                 | 13 (43.3)                   | 13 (44.8)               |
| Nutrition/diet                                         | 14 (63.6)              | 14 (63.6)                | 18 (78.3)            | 9 (29.0)                  | 8 (26.7)                    | 6 (20.7)                |
| Amitriptyline                                          | 5 (27.8)               | 4 (20.0)                 | 4 (22.2)             | 13 (41.9)                 | 10 (33.3)                   | 11 (37.9)               |
| Codeine or Morphine type painkillers                   | 13 (56.5)              | 13 (59.1)                | 19 (76.0)            | 8 (25.8)                  | 8 (26.7)                    | 4 (13.8)                |
| Biofeedback                                            | 0 (0.0)                | 0 (0.0)                  | 0 (0.0)              | 13 (41.9)                 | 12 (40.0)                   | 13 (44.8)               |
| Nerve blocks                                           | 0 (0.0)                | 2 (11.1)                 | 0 (0.0)              | 14 (45.2)                 | 12 (40.0)                   | 12 (41.4)               |
| Botox injection                                        | 0 (0.0)                | 0 (0.0)                  | 0 (0.0)              | 14 (45.2)                 | 13 (43.3)                   | 13 (44.8)               |
| Over the counter medication                            | 17 (73.9)              | 9 (47.4)                 | 17 (77.3)            | 8 (25.8)                  | 11 (36.7)                   | 7 (24.1)                |
| Contraceptive pills/patch/ring                         | 15 (68.2)              | 7 (36.8)                 | 11 (52.4)            | 9 (29.0)                  | 11 (36.7)                   | 8 (27.6)                |
| Physiotherapy                                          | 5 (26.3)               | 4 (20.0)                 | 1 (6.7)              | 12 (38.7)                 | 10 (33.3)                   | 14 (48.3)               |
| Exercise, yoga or Pilates                              | 13 (59.1)              | 12 (60.0)                | 15 (78.9)            | 9 (29.0)                  | 10 (33.3)                   | 10 (34.5)               |
| Psychological (talking) therapy                        | 3 (16.7)               | 2 (11.1)                 | 2 (13.3)             | 13 (41.9)                 | 12 (40.0)                   | 14 (48.3)               |
| Injections to suppress ovaries (e.g. Prostag, Zoladex) | 6 (33.3)               | 5 (25.0)                 | 8 (38.1)             | 13 (41.9)                 | 10 (33.3)                   | 8 (27.6)                |
| Transcutaneous Electrical Nerve Stimulation (TENS)     | 0 (0.0)                | 2 (11.1)                 | 3 (17.6)             | 13 (41.9)                 | 12 (40.0)                   | 12 (41.4)               |
| Herbal Medicine                                        | 4 (21.1)               | 5 (26.3)                 | 8 (44.4)             | 12 (38.7)                 | 11 (36.7)                   | 11 (37.9)               |
| Surgery                                                | 3 (16.7)               | 4 (23.5)                 | 6 (31.6)             | 13 (41.9)                 | 13 (43.3)                   | 10 (34.5)               |
| Meditation or relaxation exercises                     | 11 (47.8)              | 7 (38.9)                 | 10 (52.6)            | 8 (25.8)                  | 12 (40.0)                   | 10 (34.5)               |
| Other                                                  | 3 (37.5)               | 3 (33.3)                 | 4 (44.4)             | 23 (74.2)                 | 21 (70.0)                   | 20 (69.0)               |
| <b>Currently using pain treatment</b>                  |                        |                          |                      |                           |                             |                         |
| Yes                                                    | 21 (77.8)              | 18 (66.7)                | 20 (74.1)            | 4 (12.9)                  | 3 (10.0)                    | 2 (6.9)                 |
| No                                                     | 6 (22.2)               | 9 (33.3)                 | 7 (25.9)             |                           |                             |                         |

**Table 2. Baseline values of clinical outcomes**

Figures are mean (SD)

|                                          | Summary measure        |                          |                      | Missing data              |                             |                         |
|------------------------------------------|------------------------|--------------------------|----------------------|---------------------------|-----------------------------|-------------------------|
|                                          | Intervention<br>(N=31) | Active control<br>(N=30) | Usual care<br>(N=29) | Intervention<br>- no. (%) | Active control<br>- no. (%) | Usual care<br>- no. (%) |
| CPAQ pain acceptance score               | 21.9 (9.5)             | 22.7 (8.4)               | 23.8 (8.5)           | 2 (6.5)                   | 3 (10.0)                    | 1 (3.4)                 |
| HADS depression score                    | 8.7 (5.1)              | 8.6 (5.0)                | 7.4 (3.6)            | 1 (3.2)                   | 3 (10.0)                    | 2 (6.9)                 |
| HADS anxiety score                       | 12.6 (5.3)             | 12.0 (5.3)               | 10.9 (3.9)           | 1 (3.2)                   | 4 (13.3)                    | 1 (3.4)                 |
| CAMS-R mindfulness score                 | 28.6 (6.1)             | 28.8 (7.1)               | 30.3 (5.4)           | 3 (9.7)                   | 5 (16.7)                    | 3 (10.3)                |
| CPG disability score                     | 60.6 (24.4)            | 64.6 (19.6)              | 59.2 (24.4)          | 1 (3.2)                   | 3 (10.0)                    | 1 (3.4)                 |
| PSEQ Self efficacy score                 | 29.1 (14.7)            | 27.9 (14.6)              | 35.5 (10.6)          | 1 (3.2)                   | 3 (10.0)                    | 2 (6.9)                 |
| Sexual health outcomes:                  |                        |                          |                      |                           |                             |                         |
| SHOW-Q global score*                     | 45.4 (20.3)            | 50.9 (20.9)              | 58.1 (22.2)          | 5 (16.1)                  | 7 (23.3)                    | 3 (10.3)                |
| SHOW-Q pelvic problem interference score | 47.1 (29.0)            | 49.0 (32.7)              | 56.4 (25.9)          | 8 (25.8)                  | 6 (20.0)                    | 3 (10.3)                |
| MYMOP subjective outcome score           | 4.1 (1.2)              | 3.9 (1.3)                | 3.9 (1.1)            | 1 (3.2)                   | 3 (10.0)                    | 2 (6.9)                 |
| SF-36 Scales:                            |                        |                          |                      |                           |                             |                         |
| SF36 - Physical functioning              | 56.3 (30.2)            | 55.8 (32.2)              | 66.5 (30.4)          | 3 (9.7)                   | 4 (13.3)                    | 2 (6.9)                 |
| SF36 - Pain                              | 35.1 (17.5)            | 34.7 (20.6)              | 37.6 (20.6)          | 1 (3.2)                   | 3 (10.0)                    | 1 (3.4)                 |
| SF36 - General Health                    | 39.1 (20.3)            | 42.0 (19.8)              | 37.9 (21.4)          | 2 (6.5)                   | 3 (10.0)                    | 1 (3.4)                 |
| SF36 - Social functioning                | 37.5 (19.1)            | 38.0 (28.3)              | 50.4 (25.3)          | 1 (3.2)                   | 3 (10.0)                    | 1 (3.4)                 |

\*Show-Q global is only applicable for sexually active participants. At baseline there are 17 sexually active women in the intervention group, 22 in the active control group and 19 in the usual care group.

**Table 3. Baseline demographics of woman by 6 month questionnaire completion**

Figures are mean (SD) unless stated otherwise.

|                                          | 6 month follow-up<br>questionnaire returned<br>(N=33) | 6 month follow-up<br>questionnaire answered<br>by phone (N=24) | 6 month follow-up<br>questionnaire never<br>returned (N=33) |
|------------------------------------------|-------------------------------------------------------|----------------------------------------------------------------|-------------------------------------------------------------|
| <b>Demographics</b>                      |                                                       |                                                                |                                                             |
| Age (Years)                              | 35.8 (8.0)                                            | 36.6 (9.2)                                                     | 33.1 (7.5)                                                  |
| Body mass index (kg/m <sup>2</sup> )     | 27.4 (7.1)                                            | 27.7 (6.5)                                                     | 25.9 (4.5)                                                  |
| Living arrangements - no. (%)            |                                                       |                                                                |                                                             |
| Alone                                    | 2 (6.3)                                               | 1 (4.2)                                                        | 3 (10.7)                                                    |
| With others                              | 30 (93.8)                                             | 23 (95.8)                                                      | 25 (89.3)                                                   |
| Employment status - no. (%)              |                                                       |                                                                |                                                             |
| Employed                                 | 26 (78.8)                                             | 13 (54.2)                                                      | 17 (60.7)                                                   |
| Unemployed and looking for work          | 1 (3.0)                                               | 1 (4.2)                                                        | 1 (3.6)                                                     |
| At school or in full time education      | 1 (3.0)                                               | 2 (8.3)                                                        | 4 (14.3)                                                    |
| Unable to work due to long term sickness | 3 (9.1)                                               | 4 (16.7)                                                       | 3 (10.7)                                                    |
| Looking after your home/family           | 2 (6.1)                                               | 3 (12.5)                                                       | 3 (10.7)                                                    |
| Retired from paid work                   | 0 (0.0)                                               | 1 (4.2)                                                        | 0 (0.0)                                                     |
| Age left full time education - no. (%)   |                                                       |                                                                |                                                             |
| Age 12 or less                           | 0 (0.0)                                               | 3 (12.5)                                                       | 0 (0.0)                                                     |
| Age 13 to 16                             | 2 (6.1)                                               | 6 (25.0)                                                       | 8 (29.6)                                                    |
| Age 17 to 19                             | 7 (21.2)                                              | 2 (8.3)                                                        | 5 (18.5)                                                    |
| Age 20 or over                           | 23 (69.7)                                             | 9 (37.5)                                                       | 10 (37.0)                                                   |
| Still in education                       | 1 (3.0)                                               | 4 (16.7)                                                       | 4 (14.8)                                                    |
| Ethnic group - no. (%)                   |                                                       |                                                                |                                                             |
| White                                    | 18 (58.1)                                             | 9 (40.9)                                                       | 8 (30.8)                                                    |
| Black                                    | 7 (22.6)                                              | 4 (18.2)                                                       | 2 (7.7)                                                     |
| Central Asian                            | 0 (0.0)                                               | 0 (0.0)                                                        | 2 (7.7)                                                     |
| Middle Eastern                           | 0 (0.0)                                               | 0 (0.0)                                                        | 1 (3.8)                                                     |
| Southern Asian                           | 5 (16.1)                                              | 6 (27.3)                                                       | 7 (26.9)                                                    |
| Mixed                                    | 1 (3.2)                                               | 0 (0.0)                                                        | 1 (3.8)                                                     |
| Other ethnic group                       | 0 (0.0)                                               | 2 (9.1)                                                        | 4 (15.4)                                                    |
| Do not wish to say                       | 0 (0.0)                                               | 1 (4.5)                                                        | 1 (3.8)                                                     |

|                                             | 6 month follow-up<br>questionnaire returned<br>(N=33) | 6 month follow-up<br>questionnaire answered<br>by phone (N=24) | 6 month follow-up<br>questionnaire never<br>returned (N=33) |
|---------------------------------------------|-------------------------------------------------------|----------------------------------------------------------------|-------------------------------------------------------------|
| Smoker - no. (%)                            |                                                       |                                                                |                                                             |
| Yes                                         | 6 (18.8)                                              | 4 (18.2)                                                       | 7 (25.9)                                                    |
| No                                          | 26 (81.3)                                             | 18 (81.8)                                                      | 20 (74.1)                                                   |
| If yes, number of cigarettes per week       | 36.0 (24.1)                                           | 15.3 (12.5)                                                    | 44.0 (30.8)                                                 |
| Drink alcohol - no. (%)                     |                                                       |                                                                |                                                             |
| Yes                                         | 18 (56.3)                                             | 6 (27.3)                                                       | 10 (37.0)                                                   |
| No                                          | 14 (43.8)                                             | 16 (72.7)                                                      | 17 (63.0)                                                   |
| If yes, number of units per week            | 8.9 (7.2)                                             | 5.8 (5.3)                                                      | 5.2 (2.9)                                                   |
| <b>Baseline medical history</b>             |                                                       |                                                                |                                                             |
| Duration of pain - no. (%)                  |                                                       |                                                                |                                                             |
| 0 to 6 months                               | 0 (0.0)                                               | 1 (4.2)                                                        | 1 (3.6)                                                     |
| 7 to 12 months                              | 3 (9.1)                                               | 0 (0.0)                                                        | 5 (17.9)                                                    |
| 1 to 2 years                                | 6 (18.2)                                              | 3 (12.5)                                                       | 4 (14.3)                                                    |
| 3 to 5 years                                | 10 (30.3)                                             | 10 (41.7)                                                      | 6 (21.4)                                                    |
| 6 to 10 years                               | 5 (15.2)                                              | 3 (12.5)                                                       | 3 (10.7)                                                    |
| More than 10 years                          | 9 (27.3)                                              | 7 (29.2)                                                       | 9 (32.1)                                                    |
| Pain over the past week                     | 6.0 (2.5)                                             | 6.0 (2.6)                                                      | 7.5 (2.2)                                                   |
| <b>Baseline values of clinical outcomes</b> |                                                       |                                                                |                                                             |
| CPAQ pain acceptance score                  | 25.3 (8.4)                                            | 20.8 (8.8)                                                     | 21.4 (8.7)                                                  |
| HADS depression score                       | 6.6 (3.6)                                             | 8.5 (4.9)                                                      | 10.0 (4.9)                                                  |
| HADS anxiety score                          | 10.3 (4.7)                                            | 12.2 (5.1)                                                     | 13.5 (4.5)                                                  |
| CPG disability score                        | 54.5 (18.8)                                           | 65.4 (20.7)                                                    | 66.0 (27.4)                                                 |

## 1. Feasibility Outcomes

### 1.1. Follow-up

**Table 4. Losses to follow up**

|                                                           | <b>Intervention<br/>(N=31)</b> | <b>Active control<br/>(N=30)</b> | <b>Usual care<br/>(N=29)</b> |
|-----------------------------------------------------------|--------------------------------|----------------------------------|------------------------------|
| <b>Follow-up questionnaire returned - no (%)</b>          |                                |                                  |                              |
| 60 days                                                   | 15 (48.4)                      | 9 (30.0)                         | 18 (62.1)                    |
| 3 months                                                  | 17 (54.8)                      | 12 (40.0)                        | 17 (58.6)                    |
| 6 months                                                  | 11 (35.5)                      | 10 (33.3)                        | 12 (41.4)                    |
| <b>Follow-up questionnaire answered by phone - no (%)</b> |                                |                                  |                              |
| 60 days                                                   | 1 (3.2)                        | 8 (26.7)                         | 1 (3.4)                      |
| 3 months                                                  | 3 (9.7)                        | 7 (23.3)                         | 3 (10.3)                     |
| 6 months                                                  | 10 (32.3)                      | 6 (20.0)                         | 8 (27.6)                     |
| <b>Follow-up questionnaire never returned - no (%)</b>    |                                |                                  |                              |
| 60 days                                                   | 15 (48.4)                      | 13 (43.3)                        | 10 (34.5)                    |
| 3 months                                                  | 11 (35.5)                      | 11 (36.7)                        | 9 (31.0)                     |
| 6 months                                                  | 10 (32.3)                      | 14 (46.7)                        | 9 (31.0)                     |

Figure 1. Proportion of participants answering follow up questionnaire

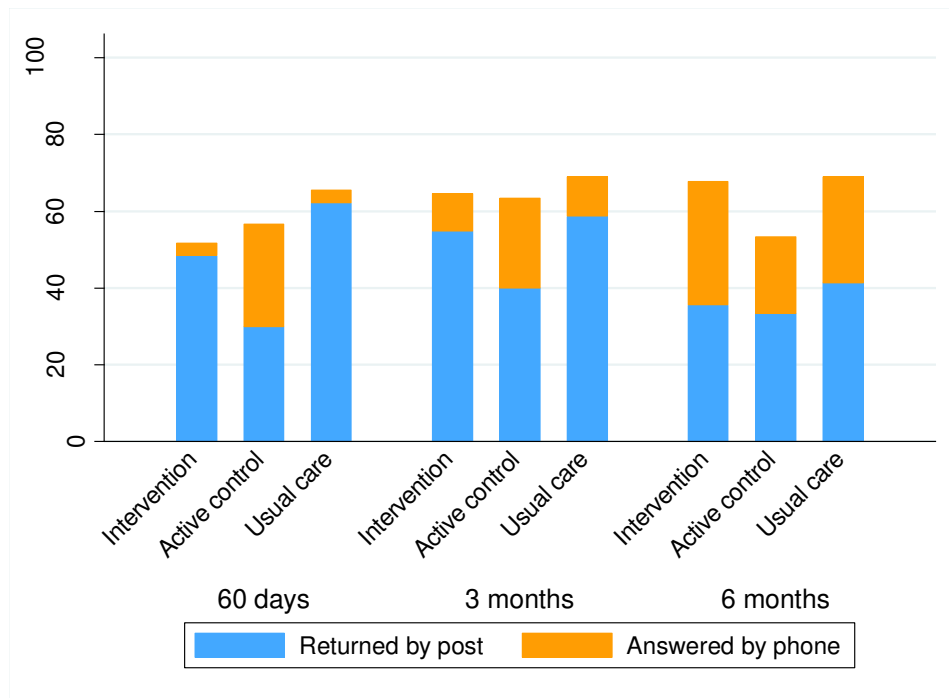



**Table 5. Follow-up questionnaire returned or answered by phone within target follow up period**

Figures are no returning data on time/no. returning data questionnaire answering by phone (%)\*.

|                             | <b>Intervention<br/>(N=31)</b> | <b>Active control<br/>(N=30)</b> | <b>Usual care<br/>(N=29)</b> |
|-----------------------------|--------------------------------|----------------------------------|------------------------------|
| 60 days (47 and 74 days)    | 7/16 (43.8)                    | 6/17 (35.3)                      | 11/19 (57.9)                 |
| 3 months (76 and 104 days)  | 7/20 (35.0)                    | 6/19 (31.6)                      | 11/20 (55.0)                 |
| 6 months (159 and 201 days) | 7/21 (33.3)                    | 6/16 (37.5)                      | 11/20 (55.0)                 |

\*Denominator for percentage is number returning data questionnaire answering by phone

## 1.2. Standard deviation of CPAQ

Table 6. Estimated standard deviation of CPAQ

|          | Number with complete outcome | Estimated standard deviation |
|----------|------------------------------|------------------------------|
| 60 days  | 50                           | 9.6                          |
| 3 months | 55                           | 8.1                          |
| 6 months | 56                           | 9.6                          |

#### 1.4. Blinding

**Table 7. Unintentional unbinding of randomised treatment**

Figures are number (%)

|                                                                                    | Summary measure        |                          | Missing data              |                             |
|------------------------------------------------------------------------------------|------------------------|--------------------------|---------------------------|-----------------------------|
|                                                                                    | Intervention<br>(N=31) | Active control<br>(N=30) | Intervention<br>- no. (%) | Active control<br>- no. (%) |
| Researchers: Which app treatment do you believe the participant was randomised to? |                        |                          | 2 (6.5)                   | 3 (10.0)                    |
| Intervention app                                                                   | 0 (0.0)                | 1 (3.7)                  |                           |                             |
| Control app                                                                        | 0 (0.0)                | 0 (0.0)                  |                           |                             |
| Don't know                                                                         | 29 (100.0)             | 26 (96.3)                |                           |                             |
| Participants: Do you think you received the new treatment or comparison treatment? |                        |                          | 15 (48.4)                 | 19 (63.3)                   |
| New treatment                                                                      | 1 (6.3)                | 1 (9.1)                  |                           |                             |
| Comparison treatment                                                               | 0 (0.0)                | 1 (9.1)                  |                           |                             |
| Don't know                                                                         | 15 (93.8)              | 9 (81.8)                 |                           |                             |

## 2. App satisfaction questionnaires

**Table 8. System usability scale**

Figures are mean (sd).

|                        | Summary measure        |                          | Missing Data              |                             |
|------------------------|------------------------|--------------------------|---------------------------|-----------------------------|
|                        | Intervention<br>(N=31) | Active control<br>(N=30) | Intervention - no.<br>(%) | Active control -<br>no. (%) |
| System usability scale | 50.7 (6.6)             | 46.0 (12.0)              | 16 (51.6)                 | 18 (60.0)                   |

**Table 9. App usability Questionnaire**

Figures are number (%).

|                                                                   | <b>Totally disagree</b> | <b>Somewhat disagree</b> | <b>Neither agree nor disagree</b> | <b>Somewhat agree</b> | <b>Totally agree</b> | <b>Not answered</b> |
|-------------------------------------------------------------------|-------------------------|--------------------------|-----------------------------------|-----------------------|----------------------|---------------------|
| <b>It is easy to use the app whenever I wanted to use it</b>      |                         |                          |                                   |                       |                      |                     |
| Intervention:                                                     | 0 (0.0)                 | 3 (9.7)                  | 1 (3.2)                           | 3 (9.7)               | 9 (29.0)             | 15 (48.4)           |
| Active control:                                                   | 0 (0.0)                 | 0 (0.0)                  | 0 (0.0)                           | 4 (13.3)              | 8 (26.7)             | 18 (60.0)           |
| <b>After being shown, I understood how the app would work</b>     |                         |                          |                                   |                       |                      |                     |
| Intervention:                                                     | 0 (0.0)                 | 1 (3.2)                  | 1 (3.2)                           | 4 (12.9)              | 9 (29.0)             | 16 (51.6)           |
| Active control:                                                   | 0 (0.0)                 | 2 (6.7)                  | 0 (0.0)                           | 2 (6.7)               | 8 (26.7)             | 18 (60.0)           |
| <b>It was fun to work with the app</b>                            |                         |                          |                                   |                       |                      |                     |
| Intervention:                                                     | 0 (0.0)                 | 2 (6.5)                  | 3 (9.7)                           | 8 (25.8)              | 2 (6.5)              | 16 (51.6)           |
| Active control:                                                   | 0 (0.0)                 | 3 (10.0)                 | 3 (10.0)                          | 5 (16.7)              | 1 (3.3)              | 18 (60.0)           |
| <b>The app worked well</b>                                        |                         |                          |                                   |                       |                      |                     |
| Intervention:                                                     | 0 (0.0)                 | 3 (9.7)                  | 2 (6.5)                           | 5 (16.1)              | 5 (16.1)             | 16 (51.6)           |
| Active control:                                                   | 0 (0.0)                 | 2 (6.7)                  | 2 (6.7)                           | 4 (13.3)              | 4 (13.3)             | 18 (60.0)           |
| <b>It was easy to work through the modules</b>                    |                         |                          |                                   |                       |                      |                     |
| Intervention:                                                     | 0 (0.0)                 | 4 (12.9)                 | 0 (0.0)                           | 5 (16.1)              | 6 (19.4)             | 16 (51.6)           |
| Active control:                                                   | 0 (0.0)                 | 2 (6.7)                  | 3 (10.0)                          | 4 (13.3)              | 3 (10.0)             | 18 (60.0)           |
| <b>The number of modules was annoying</b>                         |                         |                          |                                   |                       |                      |                     |
| Intervention:                                                     | 1 (3.2)                 | 4 (12.9)                 | 6 (19.4)                          | 5 (16.1)              | 0 (0.0)              | 15 (48.4)           |
| Active control:                                                   | 2 (6.7)                 | 3 (10.0)                 | 3 (10.0)                          | 2 (6.7)               | 2 (6.7)              | 18 (60.0)           |
| <b>The modules were well-displayed on my smartphone</b>           |                         |                          |                                   |                       |                      |                     |
| Intervention:                                                     | 0 (0.0)                 | 2 (6.5)                  | 1 (3.2)                           | 8 (25.8)              | 5 (16.1)             | 15 (48.4)           |
| Active control:                                                   | 0 (0.0)                 | 0 (0.0)                  | 2 (6.7)                           | 2 (6.7)               | 7 (23.3)             | 19 (63.3)           |
| <b>Using the app was difficult because of my daily activities</b> |                         |                          |                                   |                       |                      |                     |
| Intervention:                                                     | 2 (6.5)                 | 2 (6.5)                  | 3 (9.7)                           | 9 (29.0)              | 0 (0.0)              | 15 (48.4)           |
| Active control:                                                   | 1 (3.3)                 | 1 (3.3)                  | 0 (0.0)                           | 5 (16.7)              | 5 (16.7)             | 18 (60.0)           |
| <b>Using the app took too long</b>                                |                         |                          |                                   |                       |                      |                     |
| Intervention:                                                     | 2 (6.5)                 | 4 (12.9)                 | 3 (9.7)                           | 7 (22.6)              | 0 (0.0)              | 15 (48.4)           |
| Active control:                                                   | 1 (3.3)                 | 3 (10.0)                 | 2 (6.7)                           | 4 (13.3)              | 2 (6.7)              | 18 (60.0)           |

### 3. Clinical Outcomes

#### 3.1. Ranges of clinical outcomes

Pain acceptance score (as measured by the Chronic Pain Acceptance Questionnaire (CPAQ)):

- 0 (worst) – 48 (best)

Depression score (Hospital Anxiety and Depression Scale (HADS)):

- 0 (best) – 21 (worst)

Anxiety score (measured by HADS):

- 0 (best) – 21 (worst)

Mindfulness score (Cognitive and Mindfulness - Revised (CAMS – R) scale):

- 12 (worst) – 48 (best)

Pain related disability score (as measured by the Chronic Pain Grade (CPG) disability subscale):

- 0 (best) – 100 (worst)

Self efficacy score (as measured by the Pain Self-Efficacy Questionnaire (PSEQ)):

- 0 (worst) – 60 (best)

Sexual Health Outcomes scores (as measured by the Sexual Health Outcomes in Women Questionnaire (SHOW-Q))

- SHOW-Q global score, for sexually active participants: 0 (worst) – 100 (best)
- SHOW-Q pelvic interference score, for all participants: 0 (best) – 100 (worst)

Subjective outcome score (as measured by the Measure Yourself Medical Outcome Profile (MYMOP)):

- 0 (best) – 6 (worst)

RAND Short form (36) Health Survey (RAND SF-36) scales:

- Physical functioning: 0 (worst) – 100 (best)
- Pain: 0 (worst) – 100 (best)
- General health: 0 (worst) – 100 (best)
- Social functioning: 0 (worst) – 100 (best)

### 3.2. Completeness of clinical data

**Table 10. Partially missing clinical outcomes**

Figures are number (%)

|                                   | Not completed*<br>no. (%) | Partially completed**<br>no. (%) | Fully completed***<br>no. (%) |
|-----------------------------------|---------------------------|----------------------------------|-------------------------------|
| <b>CPAQ pain acceptance score</b> |                           |                                  |                               |
| Baseline                          | 5 (5.6)                   | 1 (1.1)                          | 84 (93.3)                     |
| 60 days                           | 40 (44.4)                 | 0 (0.0)                          | 50 (55.6)                     |
| 3 months                          | 32 (35.6)                 | 3 (3.3)                          | 55 (61.1)                     |
| 6 months                          | 34 (37.8)                 | 0 (0.0)                          | 56 (62.2)                     |
| <b>HADS depression score</b>      |                           |                                  |                               |
| Baseline                          | 5 (5.6)                   | 1 (1.1)                          | 84 (93.3)                     |
| 60 days                           | 40 (44.4)                 | 1 (1.1)                          | 49 (54.4)                     |
| 3 months                          | 32 (35.6)                 | 0 (0.0)                          | 58 (64.4)                     |
| 6 months                          | 33 (36.7)                 | 0 (0.0)                          | 57 (63.3)                     |
| <b>HADS anxiety score</b>         |                           |                                  |                               |
| Baseline                          | 5 (5.6)                   | 1 (1.1)                          | 84 (93.3)                     |
| 60 days                           | 40 (44.4)                 | 0 (0.0)                          | 50 (55.6)                     |
| 3 months                          | 32 (35.6)                 | 0 (0.0)                          | 58 (64.4)                     |
| 6 months                          | 33 (36.7)                 | 0 (0.0)                          | 57 (63.3)                     |
| <b>CAMS-R mindfulness score</b>   |                           |                                  |                               |
| Baseline                          | 5 (5.6)                   | 6 (6.7)                          | 79 (87.8)                     |
| 60 days                           | 40 (44.4)                 | 0 (0.0)                          | 50 (55.6)                     |
| 3 months                          | 32 (35.6)                 | 2 (2.2)                          | 56 (62.2)                     |
| 6 months                          | 33 (36.7)                 | 0 (0.0)                          | 57 (63.3)                     |
| <b>CPG disability score</b>       |                           |                                  |                               |
| Baseline                          | 5 (5.6)                   | 0 (0.0)                          | 85 (94.4)                     |
| 60 days                           | 40 (44.4)                 | 0 (0.0)                          | 50 (55.6)                     |
| 3 months                          | 33 (36.7)                 | 0 (0.0)                          | 57 (63.3)                     |
| 6 months                          | 34 (37.8)                 | 0 (0.0)                          | 56 (62.2)                     |
| <b>PSEQ Self efficacy score</b>   |                           |                                  |                               |
| Baseline                          | 5 (5.6)                   | 1 (1.1)                          | 84 (93.3)                     |
| 60 days                           | 50 (55.6)                 | 1 (1.1)                          | 39 (43.3)                     |
| 3 months                          | 45 (50.0)                 | 0 (0.0)                          | 45 (50.0)                     |
| 6 months                          | 57 (63.3)                 | 0 (0.0)                          | 33 (36.7)                     |

\* Questionnaire not answered or all variables used in the derivation of the outcome are missing.

\*\* One or more, but not all, variables used in the derivation of the outcome are missing.

\*\*\* No variables used in the derivation of the outcome are missing.

|                                                 | Not completed*<br>no. (%) | Partially completed**<br>no. (%) | Fully completed***<br>no. (%) |
|-------------------------------------------------|---------------------------|----------------------------------|-------------------------------|
| <b>SHOW-Q global score</b>                      |                           |                                  |                               |
| Baseline                                        | 5 (5.6)                   | 15 (16.7)                        | 70 (77.8)                     |
| 60 days                                         | 50 (55.6)                 | 6 (6.7)                          | 34 (37.8)                     |
| 3 months                                        | 47 (52.2)                 | 8 (8.9)                          | 35 (38.9)                     |
| 6 months                                        | 58 (64.4)                 | 5 (5.6)                          | 27 (30.0)                     |
| <b>SHOW-Q pelvic problem interference score</b> |                           |                                  |                               |
| Baseline                                        | 9 (10.0)                  | 8 (8.9)                          | 73 (81.1)                     |
| 60 days                                         | 51 (56.7)                 | 3 (3.3)                          | 36 (40.0)                     |
| 3 months                                        | 49 (54.4)                 | 3 (3.3)                          | 38 (42.2)                     |
| 6 months                                        | 60 (66.7)                 | 1 (1.1)                          | 29 (32.2)                     |
| <b>MYMOP subjective outcome score</b>           |                           |                                  |                               |
| Baseline                                        | 5 (5.6)                   | 1 (1.1)                          | 84 (93.3)                     |
| 60 days                                         | 38 (42.2)                 | 11 (12.2)                        | 41 (45.6)                     |
| 3 months                                        | 33 (36.7)                 | 10 (11.1)                        | 47 (52.2)                     |
| 6 months                                        | 33 (36.7)                 | 6 (6.7)                          | 51 (56.7)                     |
| <b>SF36 - General Health</b>                    |                           |                                  |                               |
| Baseline                                        | 5 (5.6)                   | 1 (1.1)                          | 84 (93.3)                     |
| 60 days                                         | 38 (42.2)                 | 11 (12.2)                        | 41 (45.6)                     |
| 3 months                                        | 31 (34.4)                 | 14 (15.6)                        | 45 (50.0)                     |
| 6 months                                        | 33 (36.7)                 | 24 (26.7)                        | 33 (36.7)                     |
| <b>SF36 - Physical functioning</b>              |                           |                                  |                               |
| Baseline                                        | 5 (5.6)                   | 4 (4.4)                          | 81 (90.0)                     |
| 60 days                                         | 48 (53.3)                 | 3 (3.3)                          | 39 (43.3)                     |
| 3 months                                        | 45 (50.0)                 | 2 (2.2)                          | 43 (47.8)                     |
| 6 months                                        | 57 (63.3)                 | 3 (3.3)                          | 30 (33.3)                     |
| <b>SF36 - Pain</b>                              |                           |                                  |                               |
| Baseline                                        | 5 (5.6)                   | 0 (0.0)                          | 85 (94.4)                     |
| 60 days                                         | 48 (53.3)                 | 0 (0.0)                          | 42 (46.7)                     |
| 3 months                                        | 45 (50.0)                 | 0 (0.0)                          | 45 (50.0)                     |
| 6 months                                        | 57 (63.3)                 | 0 (0.0)                          | 33 (36.7)                     |
| <b>SF36 - Social functioning</b>                |                           |                                  |                               |
| Baseline                                        | 5 (5.6)                   | 0 (0.0)                          | 85 (94.4)                     |
| 60 days                                         | 48 (53.3)                 | 1 (1.1)                          | 41 (45.6)                     |
| 3 months                                        | 45 (50.0)                 | 1 (1.1)                          | 44 (48.9)                     |
| 6 months                                        | 57 (63.3)                 | 1 (1.1)                          | 32 (35.6)                     |

\* Questionnaire not answered or all variables used in the derivation of the outcome are missing.

\*\* One or more, but not all, variables used in the derivation of the outcome are missing.

\*\*\* No variables used in the derivation of the outcome are missing.



**Table 11. Partially missing clinical outcomes by method of questionnaire delivery**

Figures are number (%)

|                                   | Questionnaire never returned<br>no. (%) | Questionnaire answered by telephone |                               |                               | Questionnaire returned    |                               |                               |
|-----------------------------------|-----------------------------------------|-------------------------------------|-------------------------------|-------------------------------|---------------------------|-------------------------------|-------------------------------|
|                                   |                                         | Not completed*<br>no. (%)           | Partially completed** no. (%) | Fully completed***<br>no. (%) | Not completed*<br>no. (%) | Partially completed** no. (%) | Fully completed***<br>no. (%) |
| <b>CPAQ pain acceptance score</b> |                                         |                                     |                               |                               |                           |                               |                               |
| Baseline                          | 5 (5.6)                                 | n/a                                 | n/a                           | n/a                           | 0 (0.0)                   | 1 (1.1)                       | 84 (93.3)                     |
| 60 days                           | 38 (42.2)                               | 1 (1.1)                             | 0 (0.0)                       | 9 (10.0)                      | 1 (1.1)                   | 0 (0.0)                       | 41 (45.6)                     |
| 3 months                          | 31 (34.4)                               | 0 (0.0)                             | 0 (0.0)                       | 13 (14.4)                     | 1 (1.1)                   | 3 (3.3)                       | 42 (46.7)                     |
| 6 months                          | 33 (36.7)                               | 1 (1.1)                             | 0 (0.0)                       | 23 (25.6)                     | 0 (0.0)                   | 0 (0.0)                       | 33 (36.7)                     |
| <b>HADS depression score</b>      |                                         |                                     |                               |                               |                           |                               |                               |
| Baseline                          | 5 (5.6)                                 | n/a                                 | n/a                           | n/a                           | 0 (0.0)                   | 1 (1.1)                       | 84 (93.3)                     |
| 60 days                           | 38 (42.2)                               | 1 (1.1)                             | 0 (0.0)                       | 9 (10.0)                      | 1 (1.1)                   | 1 (1.1)                       | 40 (44.4)                     |
| 3 months                          | 31 (34.4)                               | 0 (0.0)                             | 0 (0.0)                       | 13 (14.4)                     | 1 (1.1)                   | 0 (0.0)                       | 45 (50.0)                     |
| 6 months                          | 33 (36.7)                               | 0 (0.0)                             | 0 (0.0)                       | 24 (26.7)                     | 0 (0.0)                   | 0 (0.0)                       | 33 (36.7)                     |
| <b>HADS anxiety score</b>         |                                         |                                     |                               |                               |                           |                               |                               |
| Baseline                          | 5 (5.6)                                 | n/a                                 | n/a                           | n/a                           | 0 (0.0)                   | 1 (1.1)                       | 84 (93.3)                     |
| 60 days                           | 38 (42.2)                               | 1 (1.1)                             | 0 (0.0)                       | 9 (10.0)                      | 1 (1.1)                   | 0 (0.0)                       | 41 (45.6)                     |
| 3 months                          | 31 (34.4)                               | 0 (0.0)                             | 0 (0.0)                       | 13 (14.4)                     | 1 (1.1)                   | 0 (0.0)                       | 45 (50.0)                     |
| 6 months                          | 33 (36.7)                               | 0 (0.0)                             | 0 (0.0)                       | 24 (26.7)                     | 0 (0.0)                   | 0 (0.0)                       | 33 (36.7)                     |
| <b>CAMS-R mindfulness score</b>   |                                         |                                     |                               |                               |                           |                               |                               |
| Baseline                          | 5 (5.6)                                 | n/a                                 | n/a                           | n/a                           | 0 (0.0)                   | 6 (6.7)                       | 79 (87.8)                     |
| 60 days                           | 38 (42.2)                               | 1 (1.1)                             | 0 (0.0)                       | 9 (10.0)                      | 1 (1.1)                   | 0 (0.0)                       | 41 (45.6)                     |
| 3 months                          | 31 (34.4)                               | 0 (0.0)                             | 0 (0.0)                       | 13 (14.4)                     | 1 (1.1)                   | 2 (2.2)                       | 43 (47.8)                     |
| 6 months                          | 33 (36.7)                               | 0 (0.0)                             | 0 (0.0)                       | 24 (26.7)                     | 0 (0.0)                   | 0 (0.0)                       | 33 (36.7)                     |
| <b>CPG disability score</b>       |                                         |                                     |                               |                               |                           |                               |                               |
| Baseline                          | 5 (5.6)                                 | n/a                                 | n/a                           | n/a                           | 0 (0.0)                   | 0 (0.0)                       | 85 (94.4)                     |
| 60 days                           | 38 (42.2)                               | 1 (1.1)                             | 0 (0.0)                       | 9 (10.0)                      | 1 (1.1)                   | 0 (0.0)                       | 41 (45.6)                     |
| 3 months                          | 31 (34.4)                               | 0 (0.0)                             | 0 (0.0)                       | 13 (14.4)                     | 2 (2.2)                   | 0 (0.0)                       | 44 (48.9)                     |
| 6 months                          | 33 (36.7)                               | 1 (1.1)                             | 0 (0.0)                       | 23 (25.6)                     | 0 (0.0)                   | 0 (0.0)                       | 33 (36.7)                     |

\* Questionnaire not answered or all variables used in the derivation of the outcome are missing.

\*\* One or more, but not all, variables used in the derivation of the outcome are missing.

\*\*\* No variables used in the derivation of the outcome are missing.

|                                                 | Questionnaire never returned<br>no. (%) | Questionnaire answered by telephone |                                  |                               | Questionnaire returned    |                                  |                               |
|-------------------------------------------------|-----------------------------------------|-------------------------------------|----------------------------------|-------------------------------|---------------------------|----------------------------------|-------------------------------|
|                                                 |                                         | Not completed*<br>no. (%)           | Partially completed**<br>no. (%) | Fully completed***<br>no. (%) | Not completed*<br>no. (%) | Partially completed**<br>no. (%) | Fully completed***<br>no. (%) |
| <b>PSEQ Self efficacy score</b>                 |                                         |                                     |                                  |                               |                           |                                  |                               |
| Baseline                                        | 5 (5.6)                                 | n/a                                 | n/a                              | n/a                           | 0 (0.0)                   | 1 (1.1)                          | 84 (93.3)                     |
| 60 days                                         | 38 (42.2)                               | 10 (11.1)                           | 0 (0.0)                          | 0 (0.0)                       | 2 (2.2)                   | 1 (1.1)                          | 39 (43.3)                     |
| 3 months                                        | 31 (34.4)                               | 13 (14.4)                           | 0 (0.0)                          | 0 (0.0)                       | 1 (1.1)                   | 0 (0.0)                          | 45 (50.0)                     |
| 6 months                                        | 33 (36.7)                               | 24 (26.7)                           | 0 (0.0)                          | 0 (0.0)                       | 0 (0.0)                   | 0 (0.0)                          | 33 (36.7)                     |
| <b>SHOW-Q global score</b>                      |                                         |                                     |                                  |                               |                           |                                  |                               |
| Baseline                                        | 5 (5.6)                                 | n/a                                 | n/a                              | n/a                           | 0 (0.0)                   | 15 (16.7)                        | 70 (77.8)                     |
| 60 days                                         | 38 (42.2)                               | 10 (11.1)                           | 0 (0.0)                          | 0 (0.0)                       | 2 (2.2)                   | 6 (6.7)                          | 34 (37.8)                     |
| 3 months                                        | 31 (34.4)                               | 13 (14.4)                           | 0 (0.0)                          | 0 (0.0)                       | 3 (3.3)                   | 8 (8.9)                          | 35 (38.9)                     |
| 6 months                                        | 33 (36.7)                               | 24 (26.7)                           | 0 (0.0)                          | 0 (0.0)                       | 1 (1.1)                   | 5 (5.6)                          | 27 (30.0)                     |
| <b>SHOW-Q pelvic problem interference score</b> |                                         |                                     |                                  |                               |                           |                                  |                               |
| Baseline                                        | 5 (5.6)                                 | n/a                                 | n/a                              | n/a                           | 4 (4.4)                   | 8 (8.9)                          | 73 (81.1)                     |
| 60 days                                         | 38 (42.2)                               | 10 (11.1)                           | 0 (0.0)                          | 0 (0.0)                       | 3 (3.3)                   | 3 (3.3)                          | 36 (40.0)                     |
| 3 months                                        | 31 (34.4)                               | 13 (14.4)                           | 0 (0.0)                          | 0 (0.0)                       | 5 (5.6)                   | 3 (3.3)                          | 38 (42.2)                     |
| 6 months                                        | 33 (36.7)                               | 24 (26.7)                           | 0 (0.0)                          | 0 (0.0)                       | 3 (3.3)                   | 1 (1.1)                          | 29 (32.2)                     |
| <b>MYMOP subjective outcome score</b>           |                                         |                                     |                                  |                               |                           |                                  |                               |
| Baseline                                        | 5 (5.6)                                 | n/a                                 | n/a                              | n/a                           | 0 (0.0)                   | 1 (1.1)                          | 84 (93.3)                     |
| 60 days                                         | 38 (42.2)                               | 0 (0.0)                             | 1 (1.1)                          | 9 (10.0)                      | 0 (0.0)                   | 10 (11.1)                        | 32 (35.6)                     |
| 3 months                                        | 31 (34.4)                               | 0 (0.0)                             | 1 (1.1)                          | 12 (13.3)                     | 2 (2.2)                   | 9 (10.0)                         | 35 (38.9)                     |
| 6 months                                        | 33 (36.7)                               | 0 (0.0)                             | 2 (2.2)                          | 22 (24.4)                     | 0 (0.0)                   | 4 (4.4)                          | 29 (32.2)                     |

\* Questionnaire not answered or all variables used in the derivation of the outcome are missing.

\*\* One or more, but not all, variables used in the derivation of the outcome are missing.

\*\*\* No variables used in the derivation of the outcome are missing.

|                                    | Questionnaire never returned<br>no. (%) | Questionnaire answered by telephone |                                  |                               | Questionnaire returned    |                                  |                               |
|------------------------------------|-----------------------------------------|-------------------------------------|----------------------------------|-------------------------------|---------------------------|----------------------------------|-------------------------------|
|                                    |                                         | Not completed*<br>no. (%)           | Partially completed**<br>no. (%) | Fully completed***<br>no. (%) | Not completed*<br>no. (%) | Partially completed**<br>no. (%) | Fully completed***<br>no. (%) |
| <b>SF36 - General Health</b>       |                                         |                                     |                                  |                               |                           |                                  |                               |
| Baseline                           | 5 (5.6)                                 | n/a                                 | n/a                              | n/a                           | 0 (0.0)                   | 1 (1.1)                          | 84 (93.3)                     |
| 60 days                            | 38 (42.2)                               | 10 (11.1)                           | 0 (0.0)                          | 0 (0.0)                       | 0 (0.0)                   | 1 (1.1)                          | 41 (45.6)                     |
| 3 months                           | 31 (34.4)                               | 13 (14.4)                           | 0 (0.0)                          | 0 (0.0)                       | 0 (0.0)                   | 1 (1.1)                          | 45 (50.0)                     |
| 6 months                           | 33 (36.7)                               | 24 (26.7)                           | 0 (0.0)                          | 0 (0.0)                       | 0 (0.0)                   | 0 (0.0)                          | 33 (36.7)                     |
| <b>SF36 - Physical functioning</b> |                                         |                                     |                                  |                               |                           |                                  |                               |
| Baseline                           | 5 (5.6)                                 | n/a                                 | n/a                              | n/a                           | 0 (0.0)                   | 4 (4.4)                          | 81 (90.0)                     |
| 60 days                            | 38 (42.2)                               | 10 (11.1)                           | 0 (0.0)                          | 0 (0.0)                       | 0 (0.0)                   | 3 (3.3)                          | 39 (43.3)                     |
| 3 months                           | 31 (34.4)                               | 13 (14.4)                           | 0 (0.0)                          | 0 (0.0)                       | 1 (1.1)                   | 2 (2.2)                          | 43 (47.8)                     |
| 6 months                           | 33 (36.7)                               | 24 (26.7)                           | 0 (0.0)                          | 0 (0.0)                       | 0 (0.0)                   | 3 (3.3)                          | 30 (33.3)                     |
| <b>SF36 - Pain</b>                 |                                         |                                     |                                  |                               |                           |                                  |                               |
| Baseline                           | 5 (5.6)                                 | n/a                                 | n/a                              | n/a                           | 0 (0.0)                   | 0 (0.0)                          | 85 (94.4)                     |
| 60 days                            | 38 (42.2)                               | 10 (11.1)                           | 0 (0.0)                          | 0 (0.0)                       | 0 (0.0)                   | 0 (0.0)                          | 42 (46.7)                     |
| 3 months                           | 31 (34.4)                               | 13 (14.4)                           | 0 (0.0)                          | 0 (0.0)                       | 1 (1.1)                   | 0 (0.0)                          | 45 (50.0)                     |
| 6 months                           | 33 (36.7)                               | 24 (26.7)                           | 0 (0.0)                          | 0 (0.0)                       | 0 (0.0)                   | 0 (0.0)                          | 33 (36.7)                     |
| <b>SF36 - Social functioning</b>   |                                         |                                     |                                  |                               |                           |                                  |                               |
| Baseline                           | 5 (5.6)                                 | n/a                                 | n/a                              | n/a                           | 0 (0.0)                   | 0 (0.0)                          | 85 (94.4)                     |
| 60 days                            | 38 (42.2)                               | 10 (11.1)                           | 0 (0.0)                          | 0 (0.0)                       | 0 (0.0)                   | 1 (1.1)                          | 41 (45.6)                     |
| 3 months                           | 31 (34.4)                               | 13 (14.4)                           | 0 (0.0)                          | 0 (0.0)                       | 1 (1.1)                   | 1 (1.1)                          | 44 (48.9)                     |
| 6 months                           | 33 (36.7)                               | 24 (26.7)                           | 0 (0.0)                          | 0 (0.0)                       | 0 (0.0)                   | 1 (1.1)                          | 32 (35.6)                     |

\* Questionnaire not answered or all variables used in the derivation of the outcome are missing.

\*\* One or more, but not all, variables used in the derivation of the outcome are missing.

\*\*\* No variables used in the derivation of the outcome are missing.

### 3.3. Results of analysis of clinical outcomes

**Table 12. Descriptive statistics for clinical outcomes**

|                                   | Intervention (N=31) |             | Active control (N=30) |             | Usual care (N=29) |             |
|-----------------------------------|---------------------|-------------|-----------------------|-------------|-------------------|-------------|
|                                   | no. (%)             | mean (sd)   | no. (%)               | mean (sd)   | no. (%)           | mean (sd)   |
| <b>CPAQ pain acceptance score</b> |                     |             |                       |             |                   |             |
| Baseline                          | 29 (93.5)           | 21.9 (9.5)  | 27 (90.0)             | 22.7 (8.4)  | 28 (96.6)         | 23.8 (8.5)  |
| 60 days                           | 15 (48.4)           | 21.5 (10.2) | 16 (53.3)             | 22.9 (8.5)  | 19 (65.5)         | 24.3 (10.2) |
| 3 months                          | 18 (58.1)           | 20.8 (7.2)  | 18 (60.0)             | 22.9 (8.5)  | 19 (65.5)         | 25.0 (8.4)  |
| 6 months                          | 21 (67.7)           | 22.7 (10.1) | 16 (53.3)             | 24.0 (11.2) | 19 (65.5)         | 25.8 (7.6)  |
| Included in analysis*             | 27 (87.1)           |             | 23 (76.7)             |             | 25 (86.2)         |             |
| <b>HADS depression score</b>      |                     |             |                       |             |                   |             |
| Baseline                          | 30 (96.8)           | 8.7 (5.1)   | 27 (90.0)             | 8.6 (5.0)   | 27 (93.1)         | 7.4 (3.6)   |
| 60 days                           | 14 (45.2)           | 7.1 (5.2)   | 16 (53.3)             | 8.4 (4.0)   | 19 (65.5)         | 8.2 (2.9)   |
| 3 months                          | 20 (64.5)           | 8.7 (3.9)   | 19 (63.3)             | 8.2 (5.0)   | 19 (65.5)         | 6.8 (3.6)   |
| 6 months                          | 21 (67.7)           | 7.0 (4.9)   | 16 (53.3)             | 6.1 (4.4)   | 20 (69.0)         | 7.0 (4.6)   |
| Included in analysis*             | 27 (87.1)           |             | 23 (76.7)             |             | 26 (89.7)         |             |
| <b>HADS anxiety score</b>         |                     |             |                       |             |                   |             |
| Baseline                          | 30 (96.8)           | 12.6 (5.3)  | 26 (86.7)             | 12.0 (5.3)  | 28 (96.6)         | 10.9 (3.9)  |
| 60 days                           | 15 (48.4)           | 12.5 (5.6)  | 16 (53.3)             | 9.5 (4.1)   | 19 (65.5)         | 10.7 (4.1)  |
| 3 months                          | 20 (64.5)           | 12.2 (4.1)  | 19 (63.3)             | 9.7 (5.6)   | 19 (65.5)         | 10.2 (4.0)  |
| 6 months                          | 21 (67.7)           | 10.1 (4.9)  | 16 (53.3)             | 8.4 (5.5)   | 20 (69.0)         | 9.1 (4.7)   |
| Included in analysis*             | 27 (87.1)           |             | 23 (76.7)             |             | 26 (89.7)         |             |
| <b>CAMS-R mindfulness score</b>   |                     |             |                       |             |                   |             |
| Baseline                          | 28 (90.3)           | 28.6 (6.1)  | 25 (83.3)             | 28.8 (7.1)  | 26 (89.7)         | 30.3 (5.4)  |
| 60 days                           | 15 (48.4)           | 27.4 (5.6)  | 16 (53.3)             | 30.6 (8.4)  | 19 (65.5)         | 29.7 (7.6)  |
| 3 months                          | 19 (61.3)           | 29.2 (5.2)  | 19 (63.3)             | 30.9 (8.8)  | 18 (62.1)         | 31.4 (6.4)  |
| 6 months                          | 21 (67.7)           | 29.0 (7.6)  | 16 (53.3)             | 31.0 (7.3)  | 20 (69.0)         | 32.0 (8.5)  |
| Included in analysis*             | 27 (87.1)           |             | 23 (76.7)             |             | 26 (89.7)         |             |

\* Included in analysis if outcome is available for at least one follow-up time point.

|                                                 | Intervention (N=31) |             | Active control (N=30) |             | Usual care (N=29) |             |
|-------------------------------------------------|---------------------|-------------|-----------------------|-------------|-------------------|-------------|
|                                                 | no. (%)             | mean (sd)   | no. (%)               | mean (sd)   | no. (%)           | mean (sd)   |
| <b>CPG disability score</b>                     |                     |             |                       |             |                   |             |
| Baseline                                        | 30 (96.8)           | 60.6 (24.4) | 27 (90.0)             | 64.6 (19.6) | 28 (96.6)         | 59.2 (24.4) |
| 60 days                                         | 15 (48.4)           | 56.7 (19.8) | 16 (53.3)             | 54.8 (25.0) | 19 (65.5)         | 54.7 (22.9) |
| 3 months                                        | 19 (61.3)           | 61.1 (17.3) | 19 (63.3)             | 52.5 (27.5) | 19 (65.5)         | 52.8 (23.5) |
| 6 months                                        | 21 (67.7)           | 48.3 (28.1) | 16 (53.3)             | 48.5 (24.4) | 19 (65.5)         | 54.2 (23.7) |
| Included in analysis*                           | 27 (87.1)           |             | 23 (76.7)             |             | 25 (86.2)         |             |
| <b>PSEQ Self efficacy score</b>                 |                     |             |                       |             |                   |             |
| Baseline                                        | 30 (96.8)           | 29.1 (14.7) | 27 (90.0)             | 27.9 (14.6) | 27 (93.1)         | 35.5 (10.6) |
| 60 days                                         | 14 (45.2)           | 32.4 (13.9) | 9 (30.0)              | 30.9 (15.9) | 16 (55.2)         | 34.5 (13.1) |
| 3 months                                        | 17 (54.8)           | 28.9 (11.8) | 12 (40.0)             | 30.2 (14.2) | 16 (55.2)         | 39.3 (9.7)  |
| 6 months                                        | 11 (35.5)           | 34.3 (12.5) | 10 (33.3)             | 33.7 (17.7) | 12 (41.4)         | 40.2 (13.1) |
| Included in analysis*                           | 21 (67.7)           |             | 18 (60.0)             |             | 21 (72.4)         |             |
| <b>SHOW-Q global score</b>                      |                     |             |                       |             |                   |             |
| Baseline                                        | 17 (54.8)           | 45.4 (20.3) | 20 (66.7)             | 50.9 (20.9) | 19 (65.5)         | 58.1 (22.2) |
| 60 days                                         | 4 (12.9)            | 69.3 (13.3) | 8 (26.7)              | 54.1 (18.0) | 13 (44.8)         | 53.7 (24.5) |
| 3 months                                        | 5 (16.1)            | 51.1 (26.6) | 11 (36.7)             | 44.9 (19.4) | 10 (34.5)         | 61.2 (24.8) |
| 6 months                                        | 7 (22.6)            | 52.3 (15.6) | 4 (13.3)              | 60.9 (14.3) | 7 (24.1)          | 58.5 (26.4) |
| Included in analysis*                           | 9 (29.0)            |             | 14 (46.7)             |             | 16 (55.2)         |             |
| <b>SHOW-Q pelvic problem interference score</b> |                     |             |                       |             |                   |             |
| Baseline                                        | 23 (74.2)           | 47.1 (29.0) | 24 (80.0)             | 49.0 (32.7) | 26 (89.7)         | 56.4 (25.9) |
| 60 days                                         | 12 (38.7)           | 60.4 (33.7) | 9 (30.0)              | 60.2 (27.9) | 15 (51.7)         | 51.7 (28.9) |
| 3 months                                        | 12 (38.7)           | 54.9 (34.0) | 11 (36.7)             | 50.0 (25.3) | 15 (51.7)         | 69.4 (32.8) |
| 6 months                                        | 9 (29.0)            | 65.7 (22.2) | 9 (30.0)              | 59.3 (33.4) | 11 (37.9)         | 57.6 (32.8) |
| Included in analysis*                           | 16 (51.6)           |             | 17 (56.7)             |             | 20 (69.0)         |             |
| <b>MYMOP subjective outcome score</b>           |                     |             |                       |             |                   |             |
| Baseline                                        | 30 (96.8)           | 4.1 (1.2)   | 27 (90.0)             | 3.9 (1.3)   | 27 (93.1)         | 3.9 (1.1)   |
| 60 days                                         | 13 (41.9)           | 3.2 (1.4)   | 14 (46.7)             | 3.5 (1.3)   | 14 (48.3)         | 3.6 (1.2)   |
| 3 months                                        | 15 (48.4)           | 3.4 (1.3)   | 16 (53.3)             | 3.1 (1.6)   | 16 (55.2)         | 2.9 (1.4)   |
| 6 months                                        | 18 (58.1)           | 3.0 (1.4)   | 15 (50.0)             | 3.0 (1.5)   | 18 (62.1)         | 3.1 (1.5)   |
| Included in analysis*                           | 25 (80.6)           |             | 21 (70.0)             |             | 24 (82.8)         |             |

\* Included in analysis if outcome is available for at least one follow-up time point.

|                                    | Intervention (N=31) |             | Active control (N=30) |             | Usual care (N=29) |             |
|------------------------------------|---------------------|-------------|-----------------------|-------------|-------------------|-------------|
|                                    | no. (%)             | mean (sd)   | no. (%)               | mean (sd)   | no. (%)           | mean (sd)   |
| <b>SF36 - General Health</b>       |                     |             |                       |             |                   |             |
| Baseline                           | 29 (93.5)           | 39.1 (20.3) | 27 (90.0)             | 42.0 (19.8) | 28 (96.6)         | 37.9 (21.4) |
| 60 days                            | 15 (48.4)           | 45.0 (21.2) | 9 (30.0)              | 51.1 (19.2) | 17 (58.6)         | 37.6 (19.9) |
| 3 months                           | 17 (54.8)           | 44.1 (21.7) | 12 (40.0)             | 42.1 (23.2) | 16 (55.2)         | 40.3 (19.4) |
| 6 months                           | 11 (35.5)           | 54.5 (19.0) | 10 (33.3)             | 54.5 (24.2) | 12 (41.4)         | 40.0 (27.8) |
| Included in analysis*              | 21 (67.7)           |             | 18 (60.0)             |             | 22 (75.9)         |             |
| <b>SF36 - Physical functioning</b> |                     |             |                       |             |                   |             |
| Baseline                           | 28 (90.3)           | 56.3 (30.2) | 26 (86.7)             | 55.8 (32.2) | 27 (93.1)         | 66.5 (30.4) |
| 60 days                            | 13 (41.9)           | 61.2 (27.1) | 9 (30.0)              | 60.6 (25.7) | 17 (58.6)         | 66.5 (30.0) |
| 3 months                           | 15 (48.4)           | 58.3 (24.0) | 12 (40.0)             | 54.6 (30.7) | 16 (55.2)         | 69.1 (27.5) |
| 6 months                           | 10 (32.3)           | 66.0 (26.5) | 10 (33.3)             | 72.0 (28.6) | 10 (34.5)         | 63.5 (37.4) |
| Included in analysis*              | 20 (64.5)           |             | 18 (60.0)             |             | 22 (75.9)         |             |
| <b>SF36 - Pain</b>                 |                     |             |                       |             |                   |             |
| Baseline                           | 30 (96.8)           | 35.1 (17.5) | 27 (90.0)             | 34.7 (20.6) | 28 (96.6)         | 37.6 (20.6) |
| 60 days                            | 15 (48.4)           | 39.0 (19.2) | 9 (30.0)              | 43.1 (33.0) | 18 (62.1)         | 40.0 (24.5) |
| 3 months                           | 17 (54.8)           | 43.7 (17.6) | 12 (40.0)             | 46.7 (22.7) | 16 (55.2)         | 49.5 (25.9) |
| 6 months                           | 11 (35.5)           | 50.0 (17.8) | 10 (33.3)             | 61.0 (19.9) | 12 (41.4)         | 48.3 (24.8) |
| Included in analysis*              | 21 (67.7)           |             | 18 (60.0)             |             | 22 (75.9)         |             |
| <b>SF36 - Social functioning</b>   |                     |             |                       |             |                   |             |
| Baseline                           | 30 (96.8)           | 37.5 (19.1) | 27 (90.0)             | 38.0 (28.3) | 28 (96.6)         | 50.4 (25.3) |
| 60 days                            | 15 (48.4)           | 45.8 (27.4) | 9 (30.0)              | 55.6 (29.4) | 17 (58.6)         | 51.5 (28.9) |
| 3 months                           | 17 (54.8)           | 50.7 (20.9) | 12 (40.0)             | 49.0 (30.4) | 15 (51.7)         | 57.5 (29.0) |
| 6 months                           | 11 (35.5)           | 54.5 (21.8) | 10 (33.3)             | 56.3 (27.8) | 11 (37.9)         | 59.1 (34.0) |
| Included in analysis*              | 21 (67.7)           |             | 18 (60.0)             |             | 22 (75.9)         |             |

\* Included in analysis if outcome is available for at least one follow-up time point.

Table 13. Estimated treatment effects for clinical outcomes

|                                   | Intervention vs Active control<br>adjusted mean difference<br>(95% CI) | Intervention vs Usual care<br>adjusted mean difference<br>(95% CI) | Active control vs Usual care<br>adjusted mean difference<br>(95% CI) |
|-----------------------------------|------------------------------------------------------------------------|--------------------------------------------------------------------|----------------------------------------------------------------------|
| <b>CPAQ pain acceptance score</b> |                                                                        |                                                                    |                                                                      |
| 60 days                           | -2.3 (-6.6, 2.0)                                                       | -4.0 (-8.1, 0.1)                                                   | -1.7 (-5.8, 2.4)                                                     |
| 3 months                          | -3.0 (-6.8, 0.7)                                                       | -4.5 (-8.2, -0.9)                                                  | -1.5 (-5.2, 2.2)                                                     |
| 6 months                          | -1.4 (-5.8, 3.0)                                                       | -4.0 (-8.2, 0.2)                                                   | -2.5 (-7.0, 2.0)                                                     |
| <b>HADS depression score</b>      |                                                                        |                                                                    |                                                                      |
| 60 days                           | -0.7 (-2.7, 1.2)                                                       | -1.2 (-3.1, 0.6)                                                   | -0.5 (-2.3, 1.3)                                                     |
| 3 months                          | 0.5 (-1.6, 2.6)                                                        | 1.2 (-0.9, 3.4)                                                    | 0.8 (-1.4, 2.9)                                                      |
| 6 months                          | 0.5 (-1.7, 2.6)                                                        | 0.4 (-1.7, 2.4)                                                    | -0.1 (-2.3, 2.1)                                                     |
| <b>HADS anxiety score</b>         |                                                                        |                                                                    |                                                                      |
| 60 days                           | 2.0 (-0.1, 4.1)                                                        | 1.0 (-1.1, 3.0)                                                    | -1.0 (-3.0, 1.0)                                                     |
| 3 months                          | 1.9 (-0.3, 4.0)                                                        | 1.5 (-0.6, 3.6)                                                    | -0.4 (-2.5, 1.7)                                                     |
| 6 months                          | 0.1 (-2.3, 2.5)                                                        | 0.3 (-2.0, 2.6)                                                    | 0.2 (-2.2, 2.6)                                                      |
| <b>CAMS-R mindfulness score</b>   |                                                                        |                                                                    |                                                                      |
| 60 days                           | -3.5 (-7.3, 0.4)                                                       | -2.2 (-5.9, 1.4)                                                   | 1.2 (-2.5, 4.9)                                                      |
| 3 months                          | -2.5 (-5.8, 0.8)                                                       | -2.3 (-5.5, 1.0)                                                   | 0.2 (-3.1, 3.5)                                                      |
| 6 months                          | -1.4 (-4.9, 2.2)                                                       | -2.9 (-6.3, 0.4)                                                   | -1.6 (-5.1, 2.0)                                                     |
| <b>CPG disability score</b>       |                                                                        |                                                                    |                                                                      |
| 60 days                           | 5.1 (-7.2, 17.5)                                                       | 3.8 (-8.1, 15.7)                                                   | -1.4 (-13.1, 10.4)                                                   |
| 3 months                          | 8.8 (-3.4, 21.0)                                                       | 7.6 (-4.5, 19.7)                                                   | -1.2 (-13.4, 10.9)                                                   |
| 6 months                          | 1.9 (-12.1, 16.0)                                                      | 1.0 (-12.6, 14.5)                                                  | -1.0 (-15.3, 13.4)                                                   |
| <b>PSEQ Self efficacy score</b>   |                                                                        |                                                                    |                                                                      |
| 60 days                           | 0.1 (-8.2, 8.4)                                                        | -0.2 (-7.4, 6.9)                                                   | -0.3 (-8.4, 7.8)                                                     |
| 3 months                          | -3.6 (-9.8, 2.6)                                                       | -7.1 (-12.9, -1.2)                                                 | -3.5 (-9.8, 2.9)                                                     |
| 6 months                          | -5.9 (-14.8, 3.0)                                                      | -8.7 (-17.1, -0.2)                                                 | -2.8 (-11.6, 5.9)                                                    |

|                                                 | Intervention vs Active control<br>adjusted mean difference<br>(95% CI) | Intervention vs Usual care<br>adjusted mean difference<br>(95% CI) | Active control vs Usual care<br>adjusted mean difference<br>(95% CI) |
|-------------------------------------------------|------------------------------------------------------------------------|--------------------------------------------------------------------|----------------------------------------------------------------------|
| <b>SHOW-Q global score</b>                      |                                                                        |                                                                    |                                                                      |
| 60 days                                         | 7.0 (-7.2, 21.2)                                                       | 8.3 (-5.2, 21.8)                                                   | 1.3 (-9.8, 12.4)                                                     |
| 3 months                                        | 3.5 (-13.9, 20.9)                                                      | -4.8 (-22.0, 12.3)                                                 | -8.3 (-23.2, 6.6)                                                    |
| 6 months                                        | -11.5 (-27.7, 4.8)                                                     | -10.7 (-25.8, 4.3)                                                 | 0.7 (-14.5, 15.9)                                                    |
| <b>SHOW-Q pelvic problem interference score</b> |                                                                        |                                                                    |                                                                      |
| 60 days                                         | -7.2 (-28.0, 13.5)                                                     | 3.6 (-14.7, 21.9)                                                  | 10.9 (-8.9, 30.7)                                                    |
| 3 months                                        | -1.2 (-25.1, 22.8)                                                     | -10.2 (-32.5, 12.1)                                                | -9.0 (-31.9, 13.8)                                                   |
| 6 months                                        | 3.3 (-21.3, 27.9)                                                      | 4.7 (-18.7, 28.1)                                                  | 1.4 (-22.1, 24.8)                                                    |
| <b>MYMOP subjective outcome score</b>           |                                                                        |                                                                    |                                                                      |
| 60 days                                         | 0.0 (-0.7, 0.8)                                                        | -0.3 (-1.1, 0.4)                                                   | -0.4 (-1.1, 0.4)                                                     |
| 3 months                                        | 0.6 (-0.2, 1.5)                                                        | 0.6 (-0.2, 1.4)                                                    | -0.0 (-0.9, 0.8)                                                     |
| 6 months                                        | -0.2 (-1.1, 0.7)                                                       | 0.2 (-0.7, 1.1)                                                    | 0.4 (-0.6, 1.3)                                                      |
| <b>SF36 - General Health</b>                    |                                                                        |                                                                    |                                                                      |
| 60 days                                         | -8.8 (-19.4, 1.8)                                                      | -0.9 (-10.0, 8.3)                                                  | 7.9 (-2.5, 18.3)                                                     |
| 3 months                                        | 2.0 (-7.3, 11.3)                                                       | -5.6 (-14.5, 3.3)                                                  | -7.6 (-17.1, 1.9)                                                    |
| 6 months                                        | -4.6 (-18.2, 8.9)                                                      | -1.9 (-14.9, 11.0)                                                 | 2.7 (-10.8, 16.2)                                                    |
| <b>SF36 - Physical functioning</b>              |                                                                        |                                                                    |                                                                      |
| 60 days                                         | 0.1 (-16.0, 16.2)                                                      | -6.5 (-20.9, 7.9)                                                  | -6.6 (-22.2, 9.0)                                                    |
| 3 months                                        | -4.9 (-19.0, 9.3)                                                      | -7.7 (-20.8, 5.4)                                                  | -2.8 (-16.8, 11.1)                                                   |
| 6 months                                        | -2.4 (-24.7, 19.9)                                                     | 6.3 (-15.7, 28.2)                                                  | 8.6 (-13.6, 30.9)                                                    |
| <b>SF36 - Pain</b>                              |                                                                        |                                                                    |                                                                      |
| 60 days                                         | -3.7 (-19.8, 12.3)                                                     | 0.5 (-12.9, 13.9)                                                  | 4.2 (-11.4, 19.8)                                                    |
| 3 months                                        | -6.4 (-20.7, 7.9)                                                      | -7.3 (-20.8, 6.2)                                                  | -0.9 (-15.3, 13.6)                                                   |
| 6 months                                        | -8.5 (-22.8, 5.8)                                                      | 0.7 (-13.0, 14.4)                                                  | 9.2 (-5.0, 23.4)                                                     |
| <b>SF36 - Social functioning</b>                |                                                                        |                                                                    |                                                                      |
| 60 days                                         | -17.1 (-33.4, -0.7)                                                    | 5.2 (-8.8, 19.1)                                                   | 22.2 (5.7, 38.8)                                                     |
| 3 months                                        | -8.2 (-26.5, 10.1)                                                     | 4.3 (-13.2, 21.8)                                                  | 12.5 (-6.5, 31.5)                                                    |
| 6 months                                        | 0.3 (-18.9, 19.6)                                                      | 3.9 (-15.0, 22.8)                                                  | 3.5 (-16.0, 23.1)                                                    |



Figure 2. Estimated treatment effects and 95% confidence intervals for CPAQ

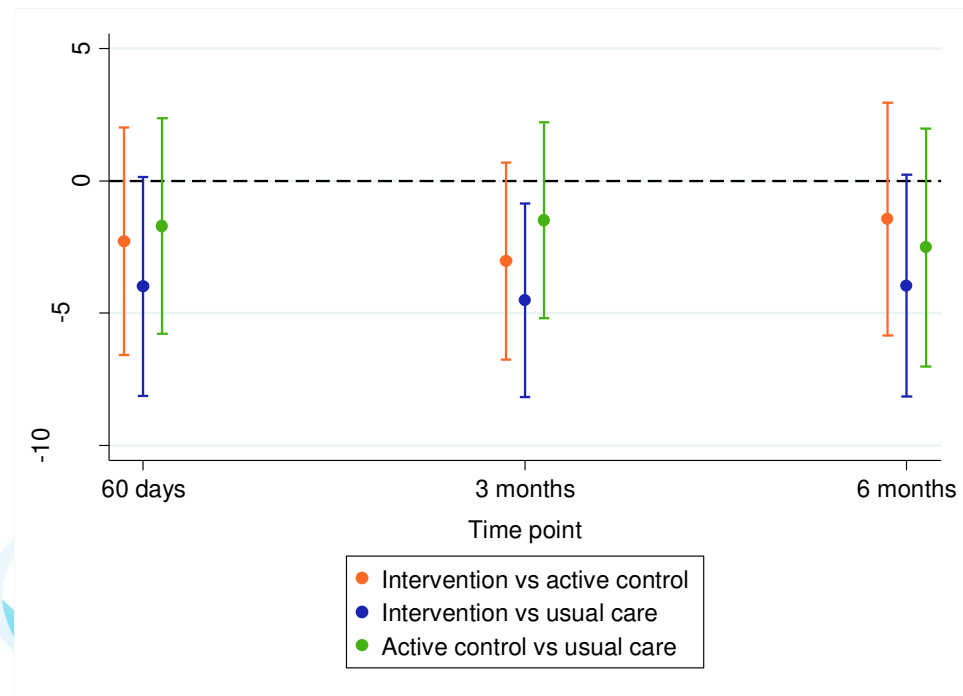

Supplement: inline-supplementary-material-3 [file inline-supplementary-material-3.pdf]
